# Supplementary material for: Het optimaliseren van een afleidingskanaal op Centraal - Java
Source: Royal Society of Chemistry journal article supplement (doi:10.1039/c1dt10615e), 1977-06-01

## SUPPORTING INFORMATION

### Phenolate and Phenoxy Radical complexes of Cu(II) and Co(III), Bearing a New Redox Active N,O-Phenol Pyrazole Ligand

Gala Zats,<sup>a</sup> Himanshu Arora,<sup>a</sup> Ronit Lavi,<sup>a</sup> Dmitri Yufit,<sup>b</sup> Laurent Benisvy\*

**Figure S11:** X-band EPR spectrum of frozen solution of **1** in CH<sub>2</sub>Cl<sub>2</sub> recorded at 77 K and its simulated spectrum. Simulation parameters:  $g_{zz} = 2.21$ ,  $g_{xx} = 2.075$ ,  $g_{yy} = 2.075$  with  $A_{zz}\{^{63,65}\text{Cu}\} = 195$  G, linewidth: 10 G.

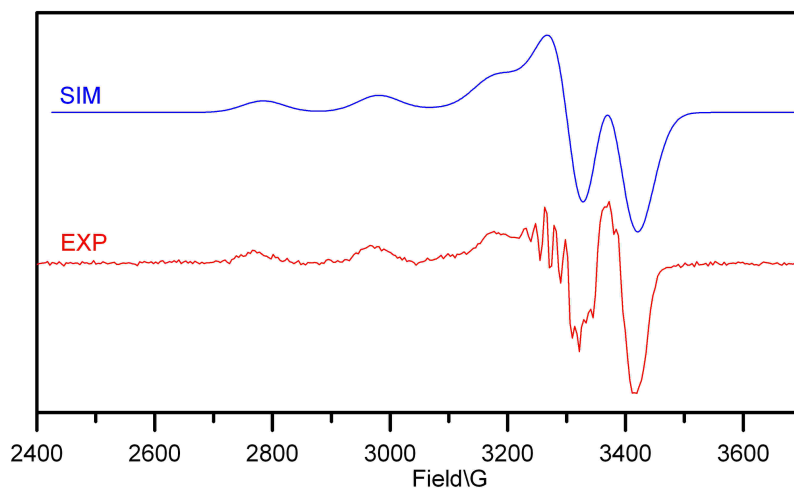

Supplement: c1dt10615e.pdf [file c1dt10615e.pdf]
